# Supplementary material
Source: PubMed Central journal article supplement (PMC4500207)
Supplement: pnas.201503302SI.pdf [file pnas.201503302SI.pdf]

# Supporting Information

Remsing et al. 10.1073/pnas.1503302112

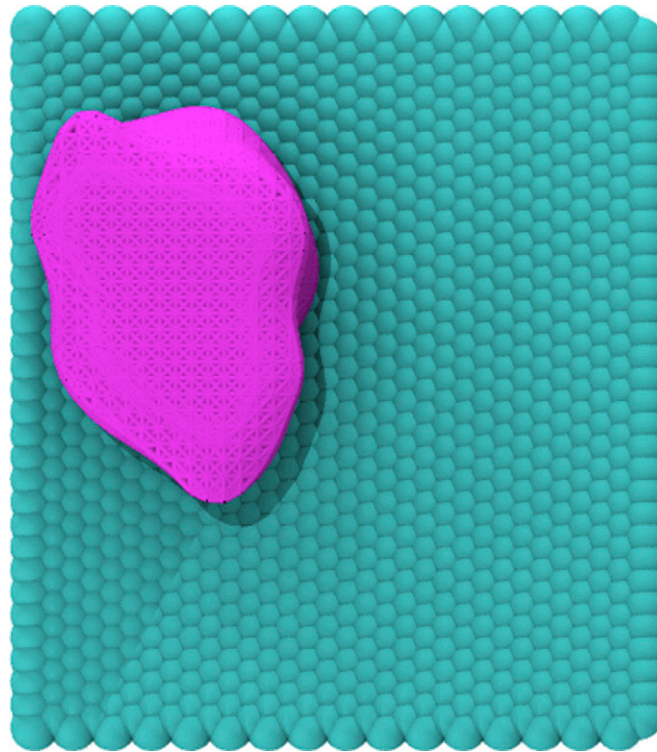

**Movie S1.** Movie illustrating a plate-spanning vapor tube in a biased simulation with  $\tilde{N}^* = 650$  and  $\kappa = 0.12$  kJ/mol, with  $\langle \tilde{N} \rangle = 653$ . Plate atoms are shown as spheres, and the purple mesh corresponds to the instantaneous interface enveloping the vapor region (water molecules have been omitted for clarity). The movie is shown from the direction perpendicular to the plane of the plates. The duration of the movie corresponds to 250 ps of simulation time.

[Movie S1](#)

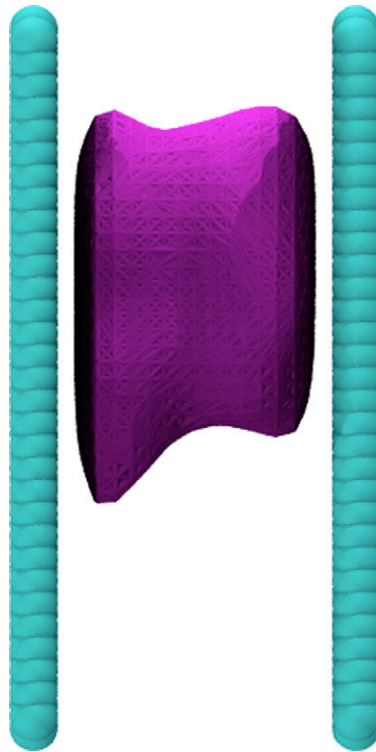

**Movie S2.** Movie illustrating a plate-spanning vapor tube in a biased simulation with  $\bar{N}^* = 650$  and  $\kappa = 0.12$  kJ/mol, with  $\langle \bar{N} \rangle = 653$ . Plate atoms are shown as spheres, and the purple mesh corresponds to the instantaneous interface enveloping the vapor region (water molecules have been omitted for clarity). The movie is shown from the direction parallel to the plane of the plates. The duration of the movie corresponds to 250 ps of simulation time.

[Movie S2](#)

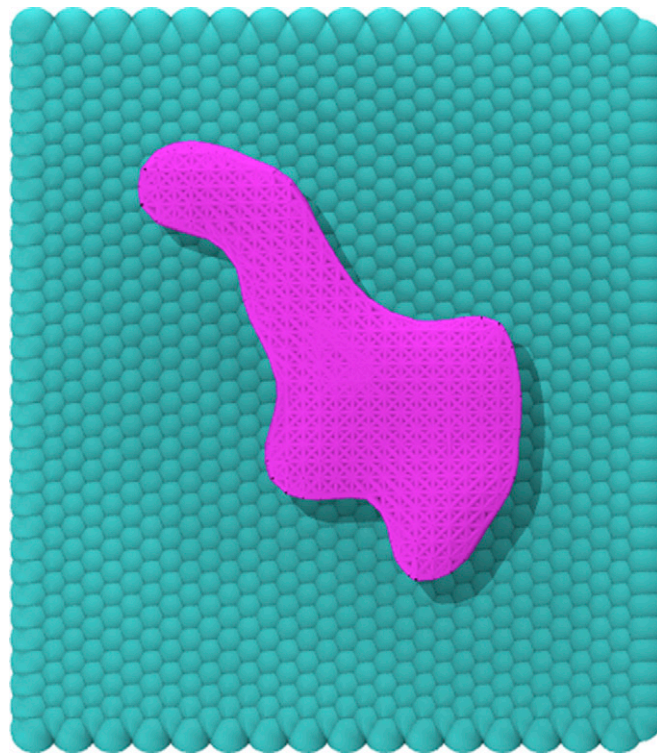

**Movie S3.** Movie illustrating vapor bubbles formed at the surface of a hydrophobic plate in a biased simulation with  $\bar{N}^* = 660$  and  $\kappa = 0.12$  kJ/mol, with  $\langle \bar{N} \rangle = 668$ . Plate atoms are shown as spheres, and the purple mesh corresponds to the instantaneous interface enveloping the vapor region (water molecules have been omitted for clarity). The movie is shown from the direction perpendicular to the plane of the plates. The duration of the movie corresponds to 250 ps of simulation time.

[Movie S3](#)

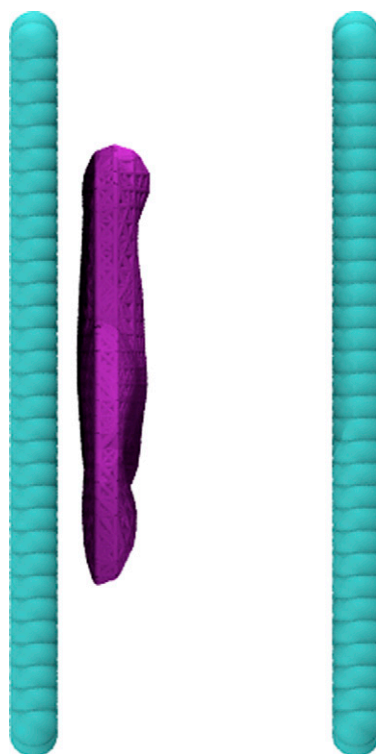

**Movie S4.** Movie illustrating vapor bubbles formed at the surface of a hydrophobic plate in a biased simulation with  $\bar{N}^* = 660$  and  $\kappa = 0.12$  kJ/mol, with  $\langle \bar{N} \rangle = 668$ . Plate atoms are shown as spheres, and the purple mesh corresponds to the instantaneous interface enveloping the vapor region (water molecules have been omitted for clarity). The movie is shown from the direction parallel to the plane of the plates. The duration of the movie corresponds to 250 ps of simulation time.

[Movie S4](#)

## Other Supporting Information Files

[SI Appendix \(PDF\)](#)
